# Supplementary material for: Assessing Methods for Evaluating the Number of Components in Non-Negative Matrix Factorization
Source: MDPI journal article supplement (doi:10.3390/math9222840), 2021-11-09
Supplement: s1 [file s1]

Archive with 1 entries (1 files):
- mathematics-1429204-supplementary.pdf
